# Supplementary material
Source: publisher site journal article supplement (https://www.spandidos-publications.com/2610/downloadSupplementary)
Supplement: Supplementary file 1 [file downloadSupplementary]

## Sheet: Table SIX
Table SIX. Multivariate Cox proportional hazards regression of miR150 on patients' survival grouped by ER status.
Variable	ER negative				ER positive
	Na	Median (Q1-Q3)b	HR (95% CI)	P-valuec	Na	Median (Q1-Q3)b	HR (95% CI)	P-valuec
Overall survival
miR150 (continuous)	232		0.58 (0.40-0.83)	0.003	793		0.67 (0.50-0.90)	0.007
miR150 (categorical)d
Low	119	22.80 (11.97-55.44)	Reference		574	23.80 (14.38-50.60)	Reference
High	113	31.93 (17.21-61.47)	0.03 (0.00-0.24)	0.001	219	40.47 (19.63-76.54)	0.16 (0.03-0.76)	0.021
Disease-free survival
miR150 (continuous)	215		0.68 (0.49-0.96)	0.029	727		0.73 (0.56-0.96)	0.023
miR150 (categorical)d
Low	112	20.63 (10.75-50.70)	Reference		518	21.78 (13.62-42.54)	Reference
High	103	28.48 (14.43-59.97)	0.08 (0.01-0.62)	0.015	209	39.13 (19.55-74.08)	0.44 (0.14-1.38)	0.159
a Number of samples, some of these variables have missing values.
b Data were shown as median (Q1-Q3 quantiles) overall or disease-free survival months.
c P-values were adjusted for diagnosis age, PR status, HER2 status, copy number alterations, lymph nodes examined number, mutation count and stage.
d Low: miR150 <9.55, High: miR150 ≥9.55.
